# Supplementary material
Source: PubMed Central journal article supplement (PMC4423358)
Supplement: 10.1534_115.176172_genetics.115.176172-3.pdf [file 10.1534_115.176172_genetics.115.176172-3.pdf]

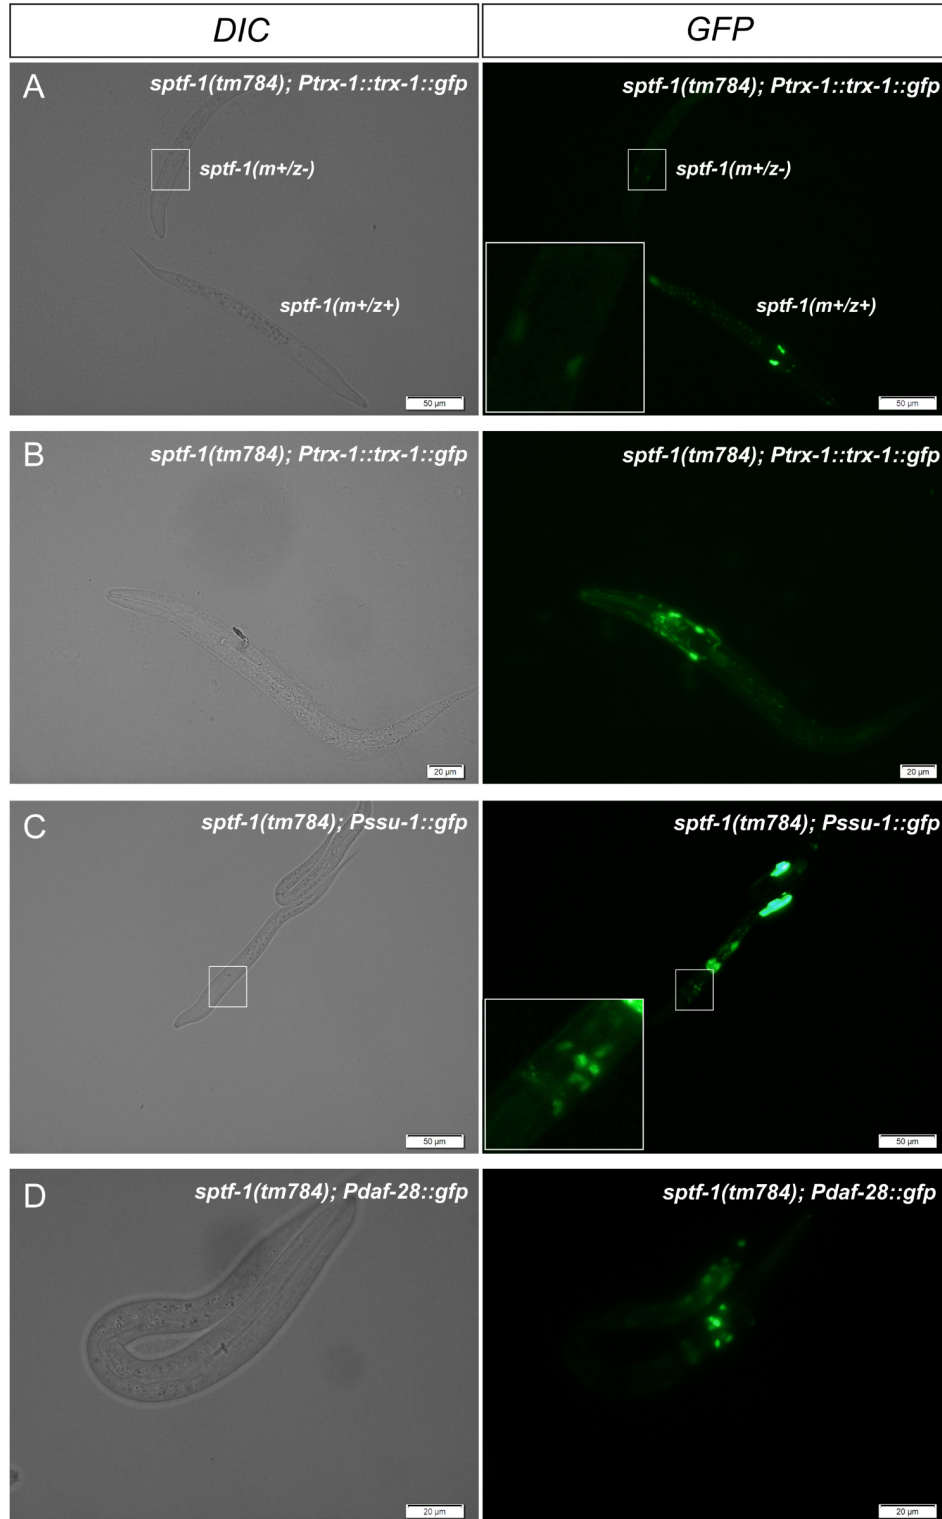

**Figure S1** *sptf-1* deficiency causes anomalous ectopic neuronal expression of fluorescence reporters of genes normally expressed in ASJ neurons. **A)** In some cases, *sptf-1* arrested L1 larvae display very weak GFP labeling in ASJ neurons, possibly due to maternal effect. **B,C,D)** In other cases, transgenic animals expressing ASJ fluorescence reporters display signal in several additional neurons in the head area.
